# Supplementary material for: The synthesis of bupropion hydrochloride under greener and safer conditions utilizing flow technologies
Source: Royal Society of Chemistry journal article supplement (doi:10.1039/d3re00443k), 2023-11-14
Supplement: d3re00443k1.xlsx [file d3re00443k1.xlsx]

## Sheet: Zero Pass Generation 1
	Supplementary Information: Appendix 2				Summary of Zero Pass Metrics Toolkit
	Yield, conversion, selectivity, AE, RME
	Reactant (Limiting Reactant First)	Mass (g)	MW	Mol	Catalyst	Mass (g)	Reagent	Mass (g)	Reaction solvent	Volume (cm3)	Density (g ml-1)	Mass (g)	Work up chemical	Mass (g)	Workup solvent	Volume (cm3)	Density (g ml-1)	Mass (g)
	3'-chloropropiophenone	5.01	168.62	0.0297118					DCM	60	1.33	79.8	Na₂SO₄	1	water	30	1	30
	liquid bromine	5.27	159.808	0.0329771					Acetonitrile	53	0.7822	41.4566			Ethyl acetate	180	0.902	162.36
	tert-butylamine	5.8	73.14	0.0793					Diethyl ether	478.8	0.7134	341.576			Sat K₂CO₃	30	1.54	46.2
	HCl	1.66	36.46	0.0455293								0			Sat NaCl	30	1.202	36.06
				#DIV/0!								0			Sat NaHCO₃	30	1.1	33
				#DIV/0!								0						0
				#DIV/0!								0						0
	Total	17.74	438.028			0		0				462.833		1				307.62
									Flag
							Yield	71.0787	71.0787
							Conversion	100	100
							Selectivity	71.0787	71.0787					mass	mw	mol
							AE	63.0553					Product	5.833	276.2	0.0211188
							RME	32.8805						mass
													Unreacted limiting reactant	0
	Solvents (Zero Pass)
	Highly hazardous solvents (Red flag for any of the following)							List Highly Hazardous Solvents Below
	Et2O, Benzene, CCl4, chloroform, DCE, nitromethane, CS2, HMPA							Et₂O
	Health and Safety (Zero Pass)
	Health & safety (Red flag for any of the following)						List substances plus the red flagged H-codes below
	Highly explosive			H200, H201, H202, H203			Liquid bromine: H330
	Explosive thermal runaway			H240
	Fatally toxic			H300, H310, H330
	Mutagenic			H350
	Repro-toxic			H360
	Serious environmental implications			H420

## Sheet: First Pass Generation 1
	Supplementary Information: Appendix 2				Summary of First Pass Metrics Toolkit
	Yield, AE, RME, MI/PMI and OE
	Reactant (Limiting Reactant First)	Mass (g)	MW	Mol	Catalyst	Mass (g)	Reagent	Mass (g)	Reaction solvent	Volume (cm3)	Density (g ml-1)	Mass (g)	Work up chemical	Mass (g)	Workup solvent	Volume (cm3)	Density (g ml-1)	Mass (g)
	3'-chloropropiophenone	5.01	168.62	0.0297118					DCM	60	1.33	79.8	Na₂SO₄	1	water	30	1	30
	liquid bromine	5.27	159.808	0.0329771					Acetonitrile	53	0.7822	41.4566			Ethyl acetate	180	0.902	162.36
	tert-butylamine	5.8	73.14	0.0793					Diethyl ether	478.8	0.7134	341.576			Sat K₂CO₃	30	1.54	46.2
	HCl	1.66	36.46	0.0455293								0			Sat NaCl	30	1.202	36.06
				#DIV/0!								0			Sat NaHCO₃	30	1.1	33
				#DIV/0!								0						0
				#DIV/0!								0						0
	Total	17.74	438.028			0		0				462.833		1				307.62
										Flag
								Yield	71.0787	71.0787
								Conversion	100	100
								Selectivity	71.0787	71.0787					Mass	MW	Mol
								AE	63.0553				Product		5.833	276.2	0.0211188
								RME	32.8805	OE	52.1455				mass
								PMI total	135.298				Unreacted limiting reactant		0
								PMI Reaction	82.3886
								PMI reactants, reagents, catlyst	3.04132
								PMI reaction solvents	79.3473
								PMI Workup	52.9093
								PMI Workup chemical	0.171438
								PMI workup solvents	52.7379
	Solvents (First Pass)							List solvents below
	Preferred solvents		water, EtOH, nBuOH, AcOipr, AcOnBu, PhOMe, MeOH, tBuOH, BnOH, ethylene glycol, acetone, MEK, MIBK, AcOEt, sulfolane					Water, AcOEt
	Problematic solvents: (acceptable only if substitution does not offer advantages)		DMSO, cyclohexanone, DMPU, AcOH, Ac2O, Acetonitrile, AcOMe, THF, heptane, Me-cyclohexane, toluene, xylene, MTBE, cyclohexane, chlorobenzene, formic acid, pyridine, Me-THF					Acetonitrile
	Hazardous solvents: These solvents have significant health and/or safety concerns.		dioxane, pentane, TEA, diisopropyl ether, DME, DCM, DMF, DMA, NMP, methoxyethanol, hexane					DCM
	Highly hazardous solvents: The solvents which are agreed not to be used, even in screening		Et2O, Benzene, CCl4, chloroform, DCE, nitromethane, CS2, HMPA					Et₂O
	Catalyst/enzyme (First Pass)				Tick						Tick
	Catalyst or enzyme used, or reaction takes place without any catalyst/reagents.			Green Flag			Facile recovery of catalyst/enzyme			Green Flag
	Use of stoichiometric quantities of reagents			Amber Flag			catalyst/enzyme not recovered			Amber Flag
	Use of reagents in excess			Red Flag	X
	Critical elements
	Supply remaining	Flag colour	Note element
	5-50 years	Red Flag
	50-500 years	Amber Flag	S
	+500 years	Green Flag	Cl, Br, N, C, H, O, Na, K
	Energy (First Pass)			Tick						Tick
	Reaction run between 0 to 70oC		Green Flag			Reaction run at reflux			Red Flag	X
	Reaction run between -20 to 0 or 70 to 140oC		Amber Flag	X		Reaction run 5oC or more below the solvent boiling point			Green Flag
	Reaction run below -20 or above 140oC		Red Flag
	Batch/flow			Tick		Work Up				List
	Flow	Green Flag				quenching			Green Flag	crystallisation, filtration
	Batch	Amber Flag		X		filtration
						centrifugation
						crystallisation
						Low temperature distillation/evaporation/ sublimation (< 140 oC at atmospheric pressure)
						solvent exchange, quenching into aqueous solvent			Amber Flag	x6 org/aq extractions
						chromatography/ion exchange			Red Flag
						high temperature distillation/evaporations/sublimation (> 140 oC at atmospheric pressure)
						multiple recrystallisation
								List substances and H-codes		List substances and H-codes		List substances and H-codes
	Health & safety
		Red Flag		Amber Flag		Green Flag		Liquid bromine: H330, H400		tert-butylamine: H331		3'-chloropropiophenone
	Highly explosive	H200, H201, H202, H203		H205, H220, H224		If no red or amber flagged H codes present then green flag				Et₂O*HCl: H331, H224		ACN
	Explosive thermal runaway	H230, H240, H250		H241						Et₂O: H224		EtOAc
	Toxic	H300, H310, H330		H301, H311, H331,						DCM: H351		water
	Long Term toxicity	H340, H350, H360, H370, H372		H341, H351, H361, H371, H373
	Environmental implications	H400, H410, H411, H420		H401, H412
	Use of chemicals of environmental concern					List substances of very high concern
	Chemical identified as Substances of Very High Concern by ChemSec which are utilised				Red Flag

## Sheet: Zero Pass Generation 2
	Supplementary Information: Appendix 2				Summary of Zero Pass Metrics Toolkit
	Yield, conversion, selectivity, AE, RME
	Reactant (Limiting Reactant First)	Mass (g)	MW	Mol	Catalyst	Mass (g)	Reagent	Mass (g)	Reaction solvent	Volume (cm3)	Density (g ml-1)	Mass (g)	Work up chemical	Mass (g)	Workup solvent	Volume (cm3)	Density (g ml-1)	Mass (g)
	3'-chloropropiophenone	2.02	168.62	0.0119796					DMSO	0.7	1.1	0.77	Na₂SO₄	0.5	water	51	1	51
	tert-butylamine	2.13	73.14	0.0291222					Acetonitrile	27.6	0.7822	21.5887	K₂CO₃	4.6	Ethyl acetate	90	0.902	81.18
	HCl	0.69	36.46	0.0189248					Diethyl ether	9.5	0.7134	6.7773			Sat NaHCO₃	30	1.1	33
	Br₂ (Polymer supported Pyridinium tribromide)	2.88	159.808	0.0180216					cyclohexane	190	0.779	148.01						0
				#DIV/0!								0						0
				#DIV/0!								0						0
				#DIV/0!								0						0
	Total	7.72	438.028			0		0				177.146		5.1				165.18
	Note: Br₂ was used as an input for Polymer bound PyBr₃ as the spent polymer is not consumed in the reaction and is readily regenerated with Br₂								Flag
							Yield	69.2101	69.2101
							Conversion	100	100
							Selectivity	69.2101	69.2101					mass	mw	mol
							AE	63.0553					Product	2.29	276.2	0.00829109
							RME	29.6632						mass
													Unreacted limiting reactant	0
	Solvents (Zero Pass)
	Highly hazardous solvents (Red flag for any of the following)							List Highly Hazardous Solvents Below
	Et2O, Benzene, CCl4, chloroform, DCE, nitromethane, CS2, HMPA							Et₂O
	Health and Safety (Zero Pass)
	Health & safety (Red flag for any of the following)						List substances plus the red flagged H-codes below
	Highly explosive			H200, H201, H202, H203
	Explosive thermal runaway			H240
	Fatally toxic			H300, H310, H330
	Mutagenic			H350
	Repro-toxic			H360
	Serious environmental implications			H420

## Sheet: First Pass Generation 2
	Supplementary Information: Appendix 2				Summary of First Pass Metrics Toolkit
	Yield, AE, RME, MI/PMI and OE
	Reactant (Limiting Reactant First)	Mass (g)	MW	Mol	Catalyst	Mass (g)	Reagent	Mass (g)	Reaction solvent	Volume (cm3)	Density (g ml-1)	Mass (g)	Work up chemical	Mass (g)	Workup solvent	Volume (cm3)	Density (g ml-1)	Mass (g)
	3'-chloropropiophenone	2.02	168.62	0.0119796					DMSO	0.7	1.1	0.77	Na₂SO₄	0.5	water	51	1	51
	tert-butylamine	2.13	73.14	0.0291222					Acetonitrile	27.6	0.7822	21.5887	K₂CO₃	4.6	Ethyl acetate	90	0.902	81.18
	HCl	0.69	36.46	0.0189248					Diethyl ether	9.5	0.7134	6.7773			Sat NaHCO₃	30	1.1	33
	Br₂ (Polymer supported Pyridinium tribromide)	2.88	159.808	0.0180216					cyclohexane	190	0.779	148.01						0
				#DIV/0!								0						0
				#DIV/0!								0						0
				#DIV/0!								0						0
	Total	7.72	438.028			0		0				177.146		5.1				165.18
	Note: Br₂ was used as an input for Polymer bound PyBr₃ as the spent polymer is not consumed in the reaction and is readily regenerated with Br₂									Flag
								Yield	69.2101	69.2101
								Conversion	100	100
								Selectivity	69.2101	69.2101					Mass	MW	Mol
								AE	63.0553				Product		2.29	276.2	0.00829109
								RME	29.6632	OE	47.0431				mass
								PMI total	155.086				Unreacted limiting reactant		0
								PMI Reaction	80.7275
								PMI reactants, reagents, catlyst	3.37118
								PMI reaction solvents	77.3563
								PMI Workup	74.3581
								PMI Workup chemical	2.22707
								PMI workup solvents	72.131
	Solvents (First Pass)							List solvents below
	Preferred solvents		water, EtOH, nBuOH, AcOipr, AcOnBu, PhOMe, MeOH, tBuOH, BnOH, ethylene glycol, acetone, MEK, MIBK, AcOEt, sulfolane					Water, AcOEt
	Problematic solvents: (acceptable only if substitution does not offer advantages)		DMSO, cyclohexanone, DMPU, AcOH, Ac2O, Acetonitrile, AcOMe, THF, heptane, Me-cyclohexane, toluene, xylene, MTBE, cyclohexane, chlorobenzene, formic acid, pyridine, Me-THF					Acetonitrile, DMSO, cyclohexane
	Hazardous solvents: These solvents have significant health and/or safety concerns.		dioxane, pentane, TEA, diisopropyl ether, DME, DCM, DMF, DMA, NMP, methoxyethanol, hexane
	Highly hazardous solvents: The solvents which are agreed not to be used, even in screening		Et2O, Benzene, CCl4, chloroform, DCE, nitromethane, CS2, HMPA					Et₂O
	Catalyst/enzyme (First Pass)				Tick						Tick
	Catalyst or enzyme used, or reaction takes place without any catalyst/reagents.			Green Flag	X		Facile recovery of catalyst/enzyme			Green Flag	X
	Use of stoichiometric quantities of reagents			Amber Flag			catalyst/enzyme not recovered			Amber Flag
	Use of reagents in excess			Red Flag	X
	Critical elements
	Supply remaining	Flag colour	Note element
	5-50 years	Red Flag
	50-500 years	Amber Flag	S
	+500 years	Green Flag	Cl, Br, N, C, H, O, Na, K
	Energy (First Pass)			Tick						Tick
	Reaction run between 0 to 70oC		Green Flag			Reaction run at reflux			Red Flag
	Reaction run between -20 to 0 or 70 to 140oC		Amber Flag	X		Reaction run 5oC or more below the solvent boiling point			Green Flag	X
	Reaction run below -20 or above 140oC		Red Flag
	Batch/flow			Tick		Work Up				List
	Flow	Green Flag		X		quenching			Green Flag	crystallisation, filtration, quenching
	Batch	Amber Flag				filtration
						centrifugation
						crystallisation
						Low temperature distillation/evaporation/ sublimation (< 140 oC at atmospheric pressure)
						solvent exchange, quenching into aqueous solvent			Amber Flag	3x org/aq extraction
						chromatography/ion exchange			Red Flag
						high temperature distillation/evaporations/sublimation (> 140 oC at atmospheric pressure)
						multiple recrystallisation
								List substances and H-codes		List substances and H-codes		List substances and H-codes
	Health & safety
		Red Flag		Amber Flag		Green Flag		Cyclohexane: H400		t-butylamine: H331		3'-chloropropiophenone
	Highly explosive	H200, H201, H202, H203		H205, H220, H224		If no red or amber flagged H codes present then green flag				Et₂O*HCl: H331, H224		ACN
	Explosive thermal runaway	H230, H240, H250		H241								EtOAc
	Toxic	H300, H310, H330		H301, H311, H331,								water
	Long Term toxicity	H340, H350, H360, H370, H372		H341, H351, H361, H371, H373								DMSO
	Environmental implications	H400, H410, H411, H420		H401, H412								Polymer-bound PyBr₃
	Use of chemicals of environmental concern					List substances of very high concern
	Chemical identified as Substances of Very High Concern by ChemSec which are utilised				Red Flag

## Sheet: Zero Pass Generation 3
	Supplementary Information: Appendix 2				Summary of Zero Pass Metrics Toolkit
	Yield, conversion, selectivity, AE, RME
	Reactant (Limiting Reactant First)	Mass (g)	MW	Mol	Catalyst	Mass (g)	Reagent	Mass (g)	Reaction solvent	Volume (cm3)	Density (g ml-1)	Mass (g)	Work up chemical	Mass (g)	Workup solvent	Volume (cm3)	Density (g ml-1)	Mass (g)
	3'-chloropropiophenone	2.5	168.62	0.0148262					DMSO	17.5	1.1	19.25	K₂CO₃	30	sat NaCl	50	1.202	60.1
	tert-butylamine	18.7	73.14	0.255674					Acetonitrile	55.7	0.7822	43.5685			sat K₂CO₃	50	1.498	74.9
	HCl	0.9	36.46	0.0246846					Diethyl ether	12.3	0.7134	8.77482			water	104	1	104
	Br₂ (Polymer supported Pyridinium tribromide)	3.6	159.81	0.0225268					Cyclohexane	102	0.779	79.458			Cyclohexane	90	0.779	70.11
				#DIV/0!								0						0
				#DIV/0!								0						0
				#DIV/0!								0						0
	Total	25.7	438.03			0		0				151.051		30				309.11
	Note: Br₂ was used as an input for Polymer bound PyBr₃ as the spent polymer is not consumed in the reaction and is readily regenerated with Br₂								Flag
							Yield	62.0414	62.0414
							Conversion	100	100
							Selectivity	62.0414	62.0414					mass	mw	mol
							AE	63.055					Product	2.5406	276.2	0.00919841
							RME	9.8856						mass
													Unreacted limiting reactant	0
	Solvents (Zero Pass)
	Highly hazardous solvents (Red flag for any of the following)							List Highly Hazardous Solvents Below
	Et2O, Benzene, CCl4, chloroform, DCE, nitromethane, CS2, HMPA							Et₂O
	Health and Safety (Zero Pass)
	Health & safety (Red flag for any of the following)						List substances plus the red flagged H-codes below
	Highly explosive			H200, H201, H202, H203
	Explosive thermal runaway			H240
	Fatally toxic			H300, H310, H330
	Mutagenic			H350
	Repro-toxic			H360
	Serious environmental implications			H420

## Sheet: First Pass Generation 3
	Supplementary Information: Appendix 2				Summary of First Pass Metrics Toolkit
	Yield, AE, RME, MI/PMI and OE
	Reactant (Limiting Reactant First)	Mass (g)	MW	Mol	Catalyst	Mass (g)	Reagent	Mass (g)	Reaction solvent	Volume (cm3)	Density (g ml-1)	Mass (g)	Work up chemical	Mass (g)	Workup solvent	Volume (cm3)	Density (g ml-1)	Mass (g)
	3'-chloropropiophenone	2.5	168.62	0.0148262					DMSO	17.5	1.1	19.25	K₂CO₃	30	sat NaCl	50	1.202	60.1
	tert-butylamine	18.7	73.14	0.255674					Acetonitrile	55.7	0.7822	43.5685			sat K₂CO₃	50	1.498	74.9
	HCl	0.9	36.46	0.0246846					Diethyl ether	12.3	0.7134	8.77482			water	104	1	104
	Br₂ (Polymer supported Pyridinium tribromide)	3.6	159.81	0.0225268					Cyclohexane	102	0.779	79.458			Cyclohexane	90	0.779	70.11
				#DIV/0!								0						0
				#DIV/0!								0						0
				#DIV/0!								0						0
	Total	25.7	438.03			0		0				151.051		30				309.11
	Note: Br₂ was used as an input for Polymer bound PyBr₃ as the spent polymer is not consumed in the reaction and is readily regenerated with Br₂									Flag
								Yield	62.0512	62.0512
								Conversion	100	100
								Selectivity	62.0512	62.0512					Mass	MW	Mol
								AE	63.055				Product		2.541	276.2	0.00919986
								RME	9.88716	OE	15.6802				mass
								PMI total	203.015				Unreacted limiting reactant		0
								PMI Reaction	69.5598
								PMI reactants, reagents, catlyst	10.1141
								PMI reaction solvents	59.4456
								PMI Workup	133.455
								PMI Workup chemical	11.8064
								PMI workup solvents	121.649
	Solvents (First Pass)							List solvents below
	Preferred solvents		water, EtOH, nBuOH, AcOipr, AcOnBu, PhOMe, MeOH, tBuOH, BnOH, ethylene glycol, acetone, MEK, MIBK, AcOEt, sulfolane					water
	Problematic solvents: (acceptable only if substitution does not offer advantages)		DMSO, cyclohexanone, DMPU, AcOH, Ac2O, Acetonitrile, AcOMe, THF, heptane, Me-cyclohexane, toluene, xylene, MTBE, cyclohexane, chlorobenzene, formic acid, pyridine, Me-THF					ACN, DMSO, cyclohexane
	Hazardous solvents: These solvents have significant health and/or safety concerns.		dioxane, pentane, TEA, diisopropyl ether, DME, DCM, DMF, DMA, NMP, methoxyethanol, hexane
	Highly hazardous solvents: The solvents which are agreed not to be used, even in screening		Et2O, Benzene, CCl4, chloroform, DCE, nitromethane, CS2, HMPA					Et₂O
	Catalyst/enzyme (First Pass)				Tick						Tick
	Catalyst or enzyme used, or reaction takes place without any catalyst/reagents.			Green Flag	X		Facile recovery of catalyst/enzyme			Green Flag	X
	Use of stoichiometric quantities of reagents			Amber Flag			catalyst/enzyme not recovered			Amber Flag
	Use of reagents in excess			Red Flag	X
	Critical elements
	Supply remaining	Flag colour	Note element
	5-50 years	Red Flag
	50-500 years	Amber Flag
	+500 years	Green Flag	Cl, Br, N, C, H, O, Na, K
	Energy (First Pass)			Tick						Tick
	Reaction run between 0 to 70oC		Green Flag			Reaction run at reflux			Red Flag
	Reaction run between -20 to 0 or 70 to 140oC		Amber Flag	X		Reaction run 5oC or more below the solvent boiling point			Green Flag	X
	Reaction run below -20 or above 140oC		Red Flag
	Batch/flow			Tick		Work Up				List
	Flow	Green Flag		X		quenching			Green Flag	quenching, filtration, crystalisation
	Batch	Amber Flag				filtration
						centrifugation
						crystallisation
						Low temperature distillation/evaporation/ sublimation (< 140 oC at atmospheric pressure)
						solvent exchange, quenching into aqueous solvent			Amber Flag	2x aq/org extraction
						chromatography/ion exchange			Red Flag
						high temperature distillation/evaporations/sublimation (> 140 oC at atmospheric pressure)
						multiple recrystallisation
								List substances and H-codes		List substances and H-codes		List substances and H-codes
	Health & safety
		Red Flag		Amber Flag		Green Flag		Cyclohexane: H400, H410		t-butylamine: H331		3'-chloropropiophenone
	Highly explosive	H200, H201, H202, H203		H205, H220, H224		If no red or amber flagged H codes present then green flag				Et₂O*HCl: H331, H224		ACN
	Explosive thermal runaway	H230, H240, H250		H241								Pyridinium tribromide (PyBr₃)
	Toxic	H300, H310, H330		H301, H311, H331,								water
	Long Term toxicity	H340, H350, H360, H370, H372		H341, H351, H361, H371, H373								DMSO
	Environmental implications	H400, H410, H411, H420		H401, H412
	Use of chemicals of environmental concern					List substances of very high concern
	Chemical identified as Substances of Very High Concern by ChemSec which are utilised				Red Flag

## Sheet: Zero Pass Generation 4
	Supplementary Information: Appendix 2				Summary of Zero Pass Metrics Toolkit
	Yield, conversion, selectivity, AE, RME
	Reactant (Limiting Reactant First)	Mass (g)	MW	Mol	Catalyst	Mass (g)	Reagent	Mass (g)	Reaction solvent	Volume (cm3)	Density (g ml-1)	Mass (g)	Work up chemical	Mass (g)	Workup solvent	Volume (cm3)	Density (g ml-1)	Mass (g)
	3'-chloropropiophenone	2.5	168.62	0.0148262					DMSO	2.59	1.1	2.849	Na₂SO₄	1	water	90	1	90
	tert-butylamine	4.39	73.14	0.0600219					Acetonitrile	34.1	0.7822	26.673			Sat NaCl	10	1.202	12.02
	HCl	1.08	36.46	0.0296215					Etyl acetate	35	0.902	31.57			sat K₂CO₃	40	1.498	59.92
	Br₂ (Polymer supported Pyridinium tribromide)	3.6	159.81	0.0225268								0			Etyl acetate	100	0.902	90.2
				#DIV/0!								0						0
				#DIV/0!								0						0
				#DIV/0!								0						0
	Total	11.57	438.03			0		0				61.092		1				252.14
	Note: Br₂ was used as an input for Polymer bound PyBr₃ as the spent polymer is not consumed in the reaction and is readily regenerated with Br₂								Flag
	The HCl (g) was generated chemically and we were unable to quantify the amount introduced into the reactor, as such we assumed the use of 2.0 equivalents HCl which proved to be sufficient in generations 2 and 3 when calculating the green metrics
							Yield	69.3576	69.3576
							Conversion	100	100
							Selectivity	69.3576	69.3576					mass	mw	mol
							AE	63.055					Product	2.8402	276.2	0.0102831
							RME	24.548						mass
													Unreacted limiting reactant	0
	Solvents (Zero Pass)
	Highly hazardous solvents (Red flag for any of the following)							List Highly Hazardous Solvents Below
	Et2O, Benzene, CCl4, chloroform, DCE, nitromethane, CS2, HMPA
	Health and Safety (Zero Pass)
	Health & safety (Red flag for any of the following)						List substances plus the red flagged H-codes below
	Highly explosive			H200, H201, H202, H203
	Explosive thermal runaway			H240
	Fatally toxic			H300, H310, H330
	Mutagenic			H350
	Repro-toxic			H360
	Serious environmental implications			H420

## Sheet: First Pass Generation 4
	Supplementary Information: Appendix 2				Summary of First Pass Metrics Toolkit
	Yield, AE, RME, MI/PMI and OE
	Reactant (Limiting Reactant First)	Mass (g)	MW	Mol	Catalyst	Mass (g)	Reagent	Mass (g)	Reaction solvent	Volume (cm3)	Density (g ml-1)	Mass (g)	Work up chemical	Mass (g)	Workup solvent	Volume (cm3)	Density (g ml-1)	Mass (g)
	3'-chloropropiophenone	2.5	168.62	0.0148262					DMSO	2.59	1.1	2.849	Na₂SO₄	1	water	90	1	90
	tert-butylamine	4.39	73.14	0.0600219					Acetonitrile	34.1	0.7822	26.673			Sat NaCl	10	1.202	12.02
	HCl	1.08	36.46	0.0296215					Ethyl acetate	35	0.902	31.57			sat K₂CO₃	40	1.498	59.92
	Br₂ (Polymer supported Pyridinium tribromide)	3.6	159.81	0.0225268								0			Ethyl acetate	100	0.902	90.2
				#DIV/0!								0						0
				#DIV/0!								0						0
				#DIV/0!								0						0
	Total	11.57	438.03			0		0				61.092		1				252.14
	Note: Br₂ was used as an input for Polymer bound PyBr₃ as the spent polymer is not consumed in the reaction and is readily regenerated with Br₂									Flag
	The HCl (g) was generated chemically and we were unable to quantify the amount introduced into the reactor, as such we assumed the use of 2.0 equivalents HCl which proved to be sufficient in generations 2 and 3 when calculating the green metrics							Yield	69.3528	69.3528
								Conversion	100	100
								Selectivity	69.3528	69.3528					Mass	MW	Mol
								AE	63.055				Product		2.84	276.2	0.0102824
								RME	24.5462	OE	38.9283				mass
								PMI total	114.719				Unreacted limiting reactant		0
								PMI Reaction	25.5852
								PMI reactants, reagents, catlyst	4.07394
								PMI reaction solvents	21.5113
								PMI Workup	89.1338
								PMI Workup chemical	0.352113
								PMI workup solvents	88.7817
	Solvents (First Pass)							List solvents below
	Preferred solvents		water, EtOH, nBuOH, AcOipr, AcOnBu, PhOMe, MeOH, tBuOH, BnOH, ethylene glycol, acetone, MEK, MIBK, AcOEt, sulfolane					water, EtOAc
	Problematic solvents: (acceptable only if substitution does not offer advantages)		DMSO, cyclohexanone, DMPU, AcOH, Ac2O, Acetonitrile, AcOMe, THF, heptane, Me-cyclohexane, toluene, xylene, MTBE, cyclohexane, chlorobenzene, formic acid, pyridine, Me-THF					DMSO, ACN
	Hazardous solvents: These solvents have significant health and/or safety concerns.		dioxane, pentane, TEA, diisopropyl ether, DME, DCM, DMF, DMA, NMP, methoxyethanol, hexane
	Highly hazardous solvents: The solvents which are agreed not to be used, even in screening		Et2O, Benzene, CCl4, chloroform, DCE, nitromethane, CS2, HMPA
	Catalyst/enzyme (First Pass)				Tick						Tick
	Catalyst or enzyme used, or reaction takes place without any catalyst/reagents.			Green Flag	X		Facile recovery of catalyst/enzyme			Green Flag	X
	Use of stoichiometric quantities of reagents			Amber Flag			catalyst/enzyme not recovered			Amber Flag
	Use of reagents in excess			Red Flag	X
	Critical elements
	Supply remaining	Flag colour	Note element
	5-50 years	Red Flag
	50-500 years	Amber Flag
	+500 years	Green Flag	Cl, Br, N, C, H, O, Na, K
	Energy (First Pass)			Tick						Tick
	Reaction run between 0 to 70oC		Green Flag			Reaction run at reflux			Red Flag
	Reaction run between -20 to 0 or 70 to 140oC		Amber Flag	X		Reaction run 5oC or more below the solvent boiling point			Green Flag	X
	Reaction run below -20 or above 140oC		Red Flag
	Batch/flow			Tick		Work Up				List
	Flow	Green Flag		X		quenching			Green Flag	quenching, filtration, crystalisation
	Batch	Amber Flag				filtration
						centrifugation
						crystallisation
						Low temperature distillation/evaporation/ sublimation (< 140 oC at atmospheric pressure)
						solvent exchange, quenching into aqueous solvent			Amber Flag	x4 aq/org extraction
						chromatography/ion exchange			Red Flag
						high temperature distillation/evaporations/sublimation (> 140 oC at atmospheric pressure)
						multiple recrystallisation
								List substances and H-codes		List substances and H-codes		List substances and H-codes
	Health & safety
		Red Flag		Amber Flag		Green Flag				t-butylamine: H331		3'-chloropropiophenone
	Highly explosive	H200, H201, H202, H203		H205, H220, H224		If no red or amber flagged H codes present then green flag						ACN
	Explosive thermal runaway	H230, H240, H250		H241								Pyridinium tribromide (PyBr₃)
	Toxic	H300, H310, H330		H301, H311, H331,								water
	Long Term toxicity	H340, H350, H360, H370, H372		H341, H351, H361, H371, H373								DMSO
	Environmental implications	H400, H410, H411, H420		H401, H412								EtOAc
	Use of chemicals of environmental concern					List substances of very high concern
	Chemical identified as Substances of Very High Concern by ChemSec which are utilised				Red Flag

## Sheet: First Pass Generation 4 Scenari
	Supplementary Information: Appendix 2				Summary of First Pass Metrics Toolkit
	Yield, AE, RME, MI/PMI and OE
	Reactant (Limiting Reactant First)	Mass (g)	MW	Mol	Catalyst	Mass (g)	Reagent	Mass (g)	Reaction solvent	Volume (cm3)	Density (g ml-1)	Mass (g)	Work up chemical	Mass (g)	Workup solvent	Volume (cm3)	Density (g ml-1)	Mass (g)
	3'-chloropropiophenone	2.5	168.62	0.0148262					DMSO	2.59	1.1	2.849	Na₂SO₄	1	water	90	1	90
	tert-butylamine	4.39	73.14	0.0600219					Acetonitrile	6.82	0.7822	5.3346			Sat NaCl	10	1.202	12.02
	HCl	1.08317	36.46	0.0297084					Ethyl acetate	7	0.902	6.314			sat K₂CO₃	40	1.498	59.92
	Br₂ (Polymer supported Pyridinium tribromide)	3.6	159.81	0.0225268								0			Etyl acetate	20	0.902	18.04
				#DIV/0!								0						0
				#DIV/0!								0						0
				#DIV/0!								0						0
	Total	11.5732	438.03			0		0				14.4976		1				179.98
	Note: Br₂ was used as an input for Polymer bound PyBr₃ as the spent polymer is not consumed in the reaction and is readily regenerated with Br₂									Flag
	Scenario representing an 80% recovery of ethyl acetate and acetonitrile and 2.0 equivalents of HCl							Yield	69.3528	69.3528
								Conversion	100	100
								Selectivity	69.3528	69.3528					Mass	MW	Mol
								AE	63.055				Product		2.84	276.2	0.0102824
								RME	24.5395	OE	38.9176				mass
								PMI total	72.9052				Unreacted limiting reactant		0
								PMI Reaction	9.17985
								PMI reactants, reagents, catlyst	4.07506
								PMI reaction solvents	5.10479
								PMI Workup	63.7254
								PMI Workup chemical	0.352113
								PMI workup solvents	63.3732
	Solvents (First Pass)							List solvents below
	Preferred solvents		water, EtOH, nBuOH, AcOipr, AcOnBu, PhOMe, MeOH, tBuOH, BnOH, ethylene glycol, acetone, MEK, MIBK, AcOEt, sulfolane					water, EtOAc
	Problematic solvents: (acceptable only if substitution does not offer advantages)		DMSO, cyclohexanone, DMPU, AcOH, Ac2O, Acetonitrile, AcOMe, THF, heptane, Me-cyclohexane, toluene, xylene, MTBE, cyclohexane, chlorobenzene, formic acid, pyridine, Me-THF					DMSO, ACN
	Hazardous solvents: These solvents have significant health and/or safety concerns.		dioxane, pentane, TEA, diisopropyl ether, DME, DCM, DMF, DMA, NMP, methoxyethanol, hexane
	Highly hazardous solvents: The solvents which are agreed not to be used, even in screening		Et2O, Benzene, CCl4, chloroform, DCE, nitromethane, CS2, HMPA
	Catalyst/enzyme (First Pass)				Tick						Tick
	Catalyst or enzyme used, or reaction takes place without any catalyst/reagents.			Green Flag	X		Facile recovery of catalyst/enzyme			Green Flag	X
	Use of stoichiometric quantities of reagents			Amber Flag			catalyst/enzyme not recovered			Amber Flag
	Use of reagents in excess			Red Flag	X
	Critical elements
	Supply remaining	Flag colour	Note element
	5-50 years	Red Flag
	50-500 years	Amber Flag
	+500 years	Green Flag	Cl, Br, N, C, H, O, Na, K
	Energy (First Pass)			Tick						Tick
	Reaction run between 0 to 70oC		Green Flag			Reaction run at reflux			Red Flag	X
	Reaction run between -20 to 0 or 70 to 140oC		Amber Flag	X		Reaction run 5oC or more below the solvent boiling point			Green Flag
	Reaction run below -20 or above 140oC		Red Flag
	Batch/flow			Tick		Work Up				List
	Flow	Green Flag		X		quenching			Green Flag	quenching, filtration, crystalisation
	Batch	Amber Flag				filtration
						centrifugation
						crystallisation
						Low temperature distillation/evaporation/ sublimation (< 140 oC at atmospheric pressure)
						solvent exchange, quenching into aqueous solvent			Amber Flag	x2 aq/org extraction
						chromatography/ion exchange			Red Flag
						high temperature distillation/evaporations/sublimation (> 140 oC at atmospheric pressure)
						multiple recrystallisation
								List substances and H-codes		List substances and H-codes		List substances and H-codes
	Health & safety
		Red Flag		Amber Flag		Green Flag				t-butylamine: H331		3'-chloropropiophenone
	Highly explosive	H200, H201, H202, H203		H205, H220, H224		If no red or amber flagged H codes present then green flag						ACN
	Explosive thermal runaway	H230, H240, H250		H241								Pyridinium tribromide (PyBr₃)
	Toxic	H300, H310, H330		H301, H311, H331,								water
	Long Term toxicity	H340, H350, H360, H370, H372		H341, H351, H361, H371, H373								DMSO
	Environmental implications	H400, H410, H411, H420		H401, H412								EtOAc
	Use of chemicals of environmental concern					List substances of very high concern
	Chemical identified as Substances of Very High Concern by ChemSec which are utilised				Red Flag

## Sheet: First Pass Perrine
	Supplementary Information: Appendix 2				Summary of First Pass Metrics Toolkit
	Yield, AE, RME, MI/PMI and OE
	Reactant (Limiting Reactant First)	Mass (g)	MW	Mol	Catalyst	Mass (g)	Reagent	Mass (g)	Reaction solvent	Volume (cm3)	Density (g ml-1)	Mass (g)	Work up chemical	Mass (g)	Workup solvent	Volume (cm3)	Density (g ml-1)	Mass (g)
	3'-chloropropiophenone	1	168.62	0.00593049					DCM	11	1.33	14.63	K₂CO₃	N/A	water	150	1	150
	tert-butylamine	3.48	73.14	0.04758					NMP	5	1.028	5.14			Diethyl ether	75	0.706	52.95
	HCl	N/A	36.46	0					IPA	N/A	0.785	0						0
	Br₂	0.9588	159.81	0.00599962								0						0
				#DIV/0!								0						0
				#DIV/0!								0						0
				#DIV/0!								0						0
	Total	5.4388	438.03			0		0				19.77		0				202.95
										Flag
								Yield	79.9755	79.9755
								Conversion	100	100
								Selectivity	79.9755	79.9755					Mass	MW	Mol
								AE	63.055				Product		1.31	276.2	0.00474294
								RME	24.0862	OE	38.1987				mass
								PMI total	174.167				Unreacted limiting reactant		0
								PMI Reaction	19.2434
								PMI reactants, reagents, catlyst	4.15176
								PMI reaction solvents	15.0916
								PMI Workup	154.924
								PMI Workup chemical	0
								PMI workup solvents	154.924
	Solvents (First Pass)							List solvents below
	Preferred solvents		water, EtOH, nBuOH, AcOipr, AcOnBu, PhOMe, MeOH, tBuOH, BnOH, ethylene glycol, acetone, MEK, MIBK, AcOEt, sulfolane					Water, IPA
	Problematic solvents: (acceptable only if substitution does not offer advantages)		DMSO, cyclohexanone, DMPU, AcOH, Ac2O, Acetonitrile, AcOMe, THF, heptane, Me-cyclohexane, toluene, xylene, MTBE, cyclohexane, chlorobenzene, formic acid, pyridine, Me-THF
	Hazardous solvents: These solvents have significant health and/or safety concerns.		dioxane, pentane, TEA, diisopropyl ether, DME, DCM, DMF, DMA, NMP, methoxyethanol, hexane					DCM, NMP
	Highly hazardous solvents: The solvents which are agreed not to be used, even in screening		Et2O, Benzene, CCl4, chloroform, DCE, nitromethane, CS2, HMPA					Et₂O
	Catalyst/enzyme (First Pass)				Tick						Tick
	Catalyst or enzyme used, or reaction takes place without any catalyst/reagents.			Green Flag			Facile recovery of catalyst/enzyme			Green Flag
	Use of stoichiometric quantities of reagents			Amber Flag			catalyst/enzyme not recovered			Amber Flag
	Use of reagents in excess			Red Flag	X
	Critical elements
	Supply remaining	Flag colour	Note element
	5-50 years	Red Flag
	50-500 years	Amber Flag
	+500 years	Green Flag	Cl, Br, N, C, H, O, Na, K
	Energy (First Pass)			Tick						Tick
	Reaction run between 0 to 70oC		Green Flag	X		Reaction run at reflux			Red Flag	X
	Reaction run between -20 to 0 or 70 to 140oC		Amber Flag			Reaction run 5oC or more below the solvent boiling point			Green Flag
	Reaction run below -20 or above 140oC		Red Flag
	Batch/flow			Tick		Work Up				List
	Flow	Green Flag				quenching			Green Flag	distillation, quenching, filtration, crystalisation
	Batch	Amber Flag		X		filtration
						centrifugation
						crystallisation
						Low temperature distillation/evaporation/ sublimation (< 140 oC at atmospheric pressure)
						solvent exchange, quenching into aqueous solvent			Amber Flag	8x aq/org extraction
						chromatography/ion exchange			Red Flag
						high temperature distillation/evaporations/sublimation (> 140 oC at atmospheric pressure)
						multiple recrystallisation
								List substances and H-codes		List substances and H-codes		List substances and H-codes
	Health & safety
		Red Flag		Amber Flag		Green Flag		Liquid bromine: H330, H400		t-butylamine: H331		3'-chloropropiophenone
	Highly explosive	H200, H201, H202, H203		H205, H220, H224		If no red or amber flagged H codes present then green flag		NMP: H360D		Et₂O: H224		HCl 32%
	Explosive thermal runaway	H230, H240, H250		H241						DCM: H351		IPA
	Toxic	H300, H310, H330		H301, H311, H331,								Water
	Long Term toxicity	H340, H350, H360, H370, H372		H341, H351, H361, H371, H373
	Environmental implications	H400, H410, H411, H420		H401, H412
	Use of chemicals of environmental concern					List substances of very high concern
	Chemical identified as Substances of Very High Concern by ChemSec which are utilised				Red Flag		NMP

[truncated: 4 more sheets: First Pass Hurst and Sherwood, First Pass Ley, First Pass Z.A.J. Pharmaceutica, First Pass Z.A.J. Validation]
